# Supplementary material for: Awareness of Cytomegalovirus Infection among Pregnant Women in Geneva, Switzerland: A Cross-sectional Study
Source: MDPI journal article supplement (doi:10.3390/ijerph121214982), 2015-12-02
Supplement: s1 [file s1]

## Awareness of Cytomegalovirus Infection among Pregnant Women in Geneva, Switzerland: A Cross-sectional Study

---

### Questionnaire

#### Survey about the Knowledge of the Cytomegalovirus Infection (CMV)

Survey Number: \_\_\_\_\_

Please mark with a cross your answers below:

#### A. A few questions on various diseases:

1. Before today, have you ever heard of:

|                           | Yes | No |
|---------------------------|-----|----|
| CMV (cytomegalovirus)     |     |    |
| Parvovirus B 19           |     |    |
| Rubella                   |     |    |
| Toxoplasmosis             |     |    |
| Group B Streptococcus     |     |    |
| Syphilis                  |     |    |
| Hepatitis B               |     |    |
| HIV/AIDS                  |     |    |
| Down Syndrom              |     |    |
| Syndrome alcoolo-fœtal    |     |    |
| Syndrom de la mort subite |     |    |
| Autism                    |     |    |
| Spina Bifida              |     |    |

#### B. A few questions on the cytomegalovirus infection:

2. Where did you hear about the cytomegalovirus infection?

- ☐ general practitioner (GP)
- ☐ obstetrician at the hospital (HUG)
- ☐ private obstetrician
- ☐ midwife
- ☐ paediatrician
- ☐ From the media (TV, radio, internet, newspapers)
- ☐ From family or friends

3. According to you, can the CMV be passed on from the mother to the foetus?

Yes ☐ No ☐ I don't know ☐

4. Could a newborn infected by CMV show these symptoms?

|                    | Yes | No | I Don't Know |
|--------------------|-----|----|--------------|
| No danger          |     |    |              |
| Loss of hearing    |     |    |              |
| Mental retardation |     |    |              |

Table. Cont.

|                          | Yes | No | I Don't Know |
|--------------------------|-----|----|--------------|
| Jaundice                 |     |    |              |
| Convulsions              |     |    |              |
| Microcephaly             |     |    |              |
| Congenital heart defects |     |    |              |
| Death                    |     |    |              |

5. Which hygiene measures can prevent the CMV during the pregnancy? Choose from the list below:

|                                                                  | Yes | No | I Don't Know |
|------------------------------------------------------------------|-----|----|--------------|
| Thorough handwashing after changing the diapers of a baby        |     |    |              |
| Not using the same cutlery as a child nor the same towel         |     |    |              |
| Using insect repellent                                           |     |    |              |
| Not eating raw meat or raw-milk cheese during pregnancy          |     |    |              |
| Drinking caffeine based beverages                                |     |    |              |
| Using gloves to clean cat                                        |     |    |              |
| Not being in contact with a child's urine, tears or running nose |     |    |              |
| Exercise during pregnancy                                        |     |    |              |
| Avoid kissing a child on the mouth                               |     |    |              |

6. To what extent those measures seem applicable during one's pregnancy:

|                                                                  | Very Easy | Fairly Easy | Fairly Hard | Very Hard |
|------------------------------------------------------------------|-----------|-------------|-------------|-----------|
| Thorough handwashing after changing the diapers of a baby        |           |             |             |           |
| Not using the same cutlery as a child nor the same towel         |           |             |             |           |
| Using insect repellent                                           |           |             |             |           |
| Not eating raw meat or raw-milk cheese during pregnancy          |           |             |             |           |
| Drinking caffeine based beverages                                |           |             |             |           |
| Using gloves to clean cat                                        |           |             |             |           |
| Not being in contact with a child's urine, tears or running nose |           |             |             |           |
| Exercise during pregnancy                                        |           |             |             |           |
| Avoid kissing a child on the mouth                               |           |             |             |           |

### C. A few questions related to your pregnancy:

7. The treatment of your 1st trimester was facilitated in Geneva:  
☐ Yes    ☐ No
8. Were you treated during the 1st trimester?  
☐ Yes    ☐ No
9. The treatment of your 1st trimester was facilitated:  
☐ In town, in Geneva  
☐ In the Maternity Ward (HUG)

- ☐ Outside Geneva
10. The treatment of your 1st trimester was facilitated:
- ☐ By a general practitioner
  - ☐ By an obstetrician
  - ☐ By a midwife
11. Have you received information related to the prevention of the CMV?
- Yes ☐ No ☐ I don't know ☐
12. Who informed you about those preventive measures?  
(Please tick as many boxes apply!)
- ☐ General Practitioner
  - ☐ Obstetrician at the Maternity Ward (HUG)
  - ☐ Private obstetrician
  - ☐ Midwife
  - ☐ Paediatrician
  - ☐ Nurse
  - ☐ Your studies
  - ☐ Media (TV, radio, internet, newspapers)
  - ☐ Family, friends
13. Have you been tested for CMV (blood test showing whether you have contracted CMV)?
- Yes ☐ No ☐ I don't know ☐
14. When were you asked to take this test?
- ☐ 1st trimester
  - ☐ 2nd trimester
  - ☐ 3rd trimester
  - ☐ every trimester
15. This test was:
- |                             | Yes | No | I Don't<br>Know |
|-----------------------------|-----|----|-----------------|
| mandatory                   |     |    |                 |
| proposed                    |     |    |                 |
| done following your request |     |    |                 |
16. Have you received further information on preventative hygiene measures of the CMV following the test?
- Yes ☐ No ☐ I don't know ☐
17. Following the detailed information, were you:
- a. Worried:
- Yes ☐ No ☐
- b. Reassured:
- Yes ☐ No ☐
18. Why?

**D. Personal questions**

19. How old are you?      |\_\_|\_\_|
20. How many children do you have? (without the one you are currently carrying)? |\_\_|\_\_|
21. What is your nationality?  
.....
22. What is your profession?  
.....
23. What level of education did you reach?
- ☐ University/Polytechnique School (EPFZ/EPFL)
  - ☐ High School diploma/ Baccalaureate
  - ☐ Apprenticeship/ Specialized formation (up to 18–19 years old)
  - ☐ Complete Compulsory School Attendance (varying depending canton/country) (up to 15–16 years old)
  - ☐ Incomplete Compulsory School Attendance (before 15–16 years old)

Thank you for bringing the completed survey to one of the researchers or in the box named <questionnaire CMV> in the midwives' office. If you forget to bring the survey back, you can also mail it to us at the address below:

© 2015 by the authors; licensee MDPI, Basel, Switzerland. This article is an open access article distributed under the terms and conditions of the Creative Commons Attribution license (<http://creativecommons.org/licenses/by/4.0/>).
